# Supplementary material
Source: PubMed Central journal article supplement (PMC3124581)
Supplement: NIHMS298838-supplement-Supp_Fig_S1-S4___Table_S1-3.pdf [file NIHMS298838-supplement-Supp_Fig_S1-S4___Table_S1-3.pdf]

## **Supplementary data**

**Table S1**

*Methanococcus maripaludis* strains used in this study.

| <u>Strains</u> | <u>Genotype or description</u>            | <u>Source or reference</u>     |
|----------------|-------------------------------------------|--------------------------------|
| S2             | Wild-type <i>M. maripaludis</i>           | (Whitman <i>et al.</i> , 1986) |
| Mm900          | S2 $\Delta hpt$                           | (Moore and Leigh, 2005)        |
| FSD6           | Mm900 $\Delta selD::pac$                  | This study                     |
| FSD10          | Mm900 $\Delta selD$                       | This study                     |
| FSD102         | Mm900 $\Delta selD \Delta pstk::pac$      | This study                     |
| FSD103         | Mm900 $\Delta selD \Delta spcS::pac$      | This study                     |
| FHM1           | Mm900 $\Delta hrsM::pac$                  | This study                     |
| FHM11          | Mm900 $\Delta hrsM::pac \Delta pstk::neo$ | This study                     |

**Table S2**

Plasmids used in this study.

| <u>Plasmids</u> | <u>Description</u>                                                                                                                                                                                                                  | <u>Source or reference</u>   |
|-----------------|-------------------------------------------------------------------------------------------------------------------------------------------------------------------------------------------------------------------------------------|------------------------------|
| pCR2.1TOPO      | Amp <sup>r</sup> Kan <sup>r</sup> cloning vector                                                                                                                                                                                    | Invitrogen                   |
| pCRPrNeo        | <i>hmv</i> promoter- <i>hpt</i> fusion + Neo <sup>r</sup> cassette in pCR2.1TOPO                                                                                                                                                    | (Moore and Leigh, 2005)      |
| pIJA03          | Pur <sup>r</sup> methanogen integration vector                                                                                                                                                                                      | (Stathopoulos et al., 2001)  |
| pIJA03hpt       | the 745 bp BglIII/XhoI fragment containing the <i>hmv</i> promoter- <i>hpt</i> fusion was excised from pCRPrNeo and ligated into BglIII/XhoI digested pIJA03                                                                        | This study                   |
| pIJA04          | from pIJA03hpt the <i>pac</i> gene was removed by XbaI/SacII- digestion and religation after blunting overhangs                                                                                                                     | This study                   |
| pJK301          | Amp <sup>R</sup> cloning vector used to construct markerless deletions in <i>Methanosarcina barkeri</i> ; contains a <i>pac-hpt</i> operon flanked by two <i>flp</i> recombinase recognition ( <i>FRT</i> ) sites                   | (Welander and Metcalf, 2008) |
| pJK301Δhpt      | the <i>Methanosarcina acetivorans hpt</i> gene was removed from pJK301 by NdeI/MfeI-digestion and religation after blunting overhangs; the KpnI site adjacent to the <i>mcr</i> terminator was removed by site-directed mutagenesis | This study                   |
| pJKM12          | the <i>hmv</i> promoter- <i>hpt-mcr</i> terminator cassette encoded on pIJA04 was excised with XhoI/KpnI and ligated into XhoI/KpnI digested pJK301Δhpt                                                                             | This study                   |
| pJKM12N         | AatII-cut neo <sup>R</sup> PCR product (using primers 12NEOF and 12NEOR and pCRPrNeo as template) cloned into AatII-cut pJKM12; correct orientation confirmed by sequencing; replaces Pur <sup>R</sup> with Neo <sup>R</sup>        | This study                   |
| pJKM12ΔselD     | deletion construct of <i>selD</i> in pJKM12. PCR products using primers SELDNF-SELDNR and SELDCF-SELDCR cloned into NotI/BamHI and HindIII/XhoI sites of pJKM12                                                                     | This study                   |
| pJKM12ΔpstK     | deletion construct of <i>pstK</i> in pJKM12. PCR products using primers PSTKNF-PSTKNR and PSTKCF-PSTKCR cloned into NotI/BamHI and HindIII/XhoI sites of pJKM12                                                                     | This study                   |
| pJKM12NΔpstK    | deletion construct of <i>pstK</i> in pJKM12N. PCR products using primers PSTKNF-PSTKNR and PSTKCF-PSTKCR cloned into NotI/BamHI and HindIII/XhoI sites of pJKM12                                                                    | This study                   |
| pJKM12ΔhrsM     | deletion construct of <i>hrsM</i> in pJKM12. PCR products using primers HRSMNF-HRSMNR and HRSMCF-HRSMCR cloned into NotI/BamHI and HindIII/XhoI sites of pJKM12                                                                     | This study                   |
| pJKM12ΔspcS     | deletion construct of <i>spcS</i> in pJKM12. PCR products using primers SPCSNF-SPCSNR and SPCSCF-SPCSCR cloned into NotI/BamHI and HindIII/XhoI sites of pJKM12                                                                     | This study                   |
| pMEV2           | Neo <sup>r</sup> shuttle vector                                                                                                                                                                                                     | (Lin and Whitman, 2004)      |
| pECSD           | PstI/XbaI-cut <i>E. coli selD</i> PCR product (using primers ECSDF and ECSDR) cloned into NsiI/XbaI-cut pMEV2                                                                                                                       | This study                   |
| pECSA           | NsiI/XbaI-cut <i>E. coli selA</i> PCR product (using primers ECSAF and ECSAR) was ligated to the <i>hpt</i> -containing XbaI/NarI restriction fragment from pCRPrNeo; this construct was then ligated into NsiI/NarI-digested pMEV2 | This study                   |
| pFLPH           | <i>S. cerevisiae</i> Flp recombinase expression vector. PstI/XbaI- cut <i>flp</i> PCR product (using primers FLPF and FLPR) was ligated into NsiI/XbaI-digested pMEV2                                                               | This study                   |

**Table S3**

Oligonucleotides used in this study. Added recognition sites for restriction endonucleases are underlined.

| Primer | Sequence                                              | added restriction site |
|--------|-------------------------------------------------------|------------------------|
| FLPF   | AACTGCAGATGCCACAATTTGGTATATT                          | PstI                   |
| FLPR   | GC <u>CTAGAT</u> TATATGCGTCTATTTATGT                  | XbaI                   |
| 12NEOF | GGAATTC <u>GACGTC</u> ATGATTGAACAAGATGGATTGCA         | AatII                  |
| 12NEOR | GGAATTC <u>GACGTC</u> TCAGAAGAAGCTCGTC                | AatII                  |
| SELDNF | ATAAGAAT <u>GCGGCCGC</u> GAGGGCAACAGTATTTAGCG         | NotI                   |
| SELDNR | <u>GGGATCC</u> CTGGTAGAATTACATGCCGC                   | BamHI                  |
| SELDNF | CCC <u>AAGCTT</u> CCAGAATACAAGGATAAAATTA              | HindIII                |
| SELDNR | CCG <u>CTCGAG</u> GTTATACATGCCGACAGTAC                | XhoI                   |
| PSTKNF | ATAAGAAT <u>GCGGCCGC</u> GCTGCTCCGATTTTGACGACTTCGTTAG | NotI                   |
| PSTKNR | <u>GGGATCC</u> CAAAGGCGCTTTGAGATATA                   | BamHI                  |
| PSTKCF | CCC <u>AAGCTT</u> CTGAGAAGTTAGATTTTGA                 | HindIII                |
| PSTKCR | CCG <u>CTCGAG</u> CTTGCATCCGGAGTTTCTCC                | XhoI                   |
| HRSMNF | ATAAGAAT <u>GCGGCCGC</u> TCCAGAAACATCTTCTATAAACAAAC   | NotI                   |
| HRSMNR | <u>GGGATCC</u> GGGTCCATGGTATCACTATTATTATACGTTTATCTT   | BamHI                  |
| HRSMCF | CCC <u>AAGCTT</u> AGGGTAAAAAACAAGAAACC                | HindIII                |
| HRSMCR | CCG <u>CTCGAGA</u> ATTACTTGATGAAACATCA                | XhoI                   |
| SPCSNF | ATAAGAAT <u>GCGGCCGC</u> ATTATCTCGAATAAGTTCTC         | NotI                   |
| SPCSNR | <u>GGGATCC</u> CCTTCAATATTTAAAAATCGAGCATTATATCACG     | BamHI                  |
| SPSCF  | CCC <u>AAGCTT</u> TGGAAACTGTTATTTGGGAACTTATAACC       | HindIII                |
| SPSCR  | CCG <u>CTCGAGA</u> ATTTTAATTGTACTACCAT                | XhoI                   |
| YBBBNF | ATAAGAAT <u>GCGGCCGC</u> CCCCTACCTGTAACGTATGC         | NotI                   |
| YBBBNR | <u>GGGATCC</u> CACCAGAGATACAGTAGTAAAA                 | BamHI                  |
| YBBBCF | CCC <u>AAGCTT</u> TGGATTTAAAGTAAAAAGACTTGTAGGTG       | HindIII                |
| YBBBCR | CCG <u>CTCGAG</u> CCAAATGTTGGAAAATCAAC                | XhoI                   |
| ECSDF  | AACTGCAGATGAGCGGAGAACTCGATTCGTTTGACCC                 | PstI                   |
| ECSDR  | GC <u>CTAGAT</u> TTAACGAATCTCAACCATGG                 | XbaI                   |
| ECSAF  | CCAA <u>TGCATAT</u> GACAACCGAAACGCGTCCCTCTAT          | NsiI                   |
| ECSAR  | GC <u>CTAGAG</u> TCAATTCACAACATCTCCA                  | XbaI                   |
| FRCA-F | AAGACACGAAGGGCATACCAAACCTT                            |                        |
| FRCA-R | GGCAAATTCACAGAAATCTCGAAA                              |                        |
| VHCD-F | GTAGTGGCAATCTCCAAGGTGGC                               |                        |
| VHCD-R | GGTGCAGATACAGCAGGAGTTGGTA                             |                        |
| VHU-F  | ATGTTACCAGTGAGGATACGGTGCA                             |                        |
| VHU-R  | TGCAACGAATACAGCATCAGCG                                |                        |

### Figure S1

Generation of marked and markerless deletion mutants of *selD* (MMP0904) in *M. maripaludis* Mm900. (A) Disruption of the gene encoding SelD in *M. maripaludis* Mm900 by the *FRT-pac-FRT* cassette as a result of two homologous recombinations upon transformation with suicide plasmid pJKM12ΔselD gave rise to six clones (named FSD1-FSD6). From the FSD6 strain the *pac*-cassette was removed by *flp*-recombinase mediated recombination to yield strain FDS10. (B) Replacement of wild-type *selD* in strain Mm900 (lane 7) with the *FRT-pac-FRT* cassette was confirmed by Southern hybridization. Lanes 1-6: FSD1-FSD6. Genomic DNAs were digested with ClaI and MscI and hybridized with a DIG-labeled probe complementary to a 640bp fragment overlapping the upstream flanking region and first 230 bp of MMP0904. (C) Southern hybridization confirming the markerless deletion of *selD* in strain FSD10. Genomic DNA of strains Mm900 (lane 1), FSD6 (lane 2) and FSD10 (lane 3) was digested with ClaI and MscI and hybridized with the same probe as in (B).

### Figure S2

Generation of a marked deletion mutant of *pstK* (MMP1490) in *M. maripaludis* strain FSD10. (A) The gene encoding PSTK in the *M. maripaludis* FSD10 strain was disrupted by the *FRT-pac-FRT* cassette as a result of two homologous recombinations upon transformation with suicide plasmid pJKM12ΔpstK. After verification of the genotype, one randomly selected *pstK* mutant was designated FSD102. (B) Disruption of *pstK* was confirmed by Southern hybridization. Genomic DNA of 3 randomly selected puromycin resistant clones (lane 1-3) and of FSD10 (lane 4) was digested with PacI and NsiI and hybridized with a DIG-labeled probe complementary to a 530 bp fragment overlapping the last 70 bp of MMP1490 and the adjacent downstream flanking region.

### Figure S3

Generation of a marked deletion mutant of *spcS* (MMP0595) in *M. maripaludis* strain FSD10. (A) The gene encoding SepSecS in the *M. maripaludis* FSD10 strain was disrupted by the *FRT-pac-FRT* cassette as a result of two homologous recombinations upon transformation with suicide plasmid pJKM12ΔspcS. After verification of the genotype, one randomly selected *spcS* mutant was designated FSD103. (B) Disruption of *spcS* was confirmed by Southern hybridization. Genomic DNA of FSD103 (lane 1) and of FSD10 (lane 2) was digested with BamHI and hybridized with a DIG-labeled probe complementary to a 480 bp fragment overlapping the upstream flanking region and first 23 bp of MMP0595.

### Figure S4

Generation of a marked deletion mutant of *pstK* (MMP1490) in *M. maripaludis* strain FHM1. (A) The gene encoding PSTK in the *M. maripaludis* FHM1 strain was disrupted by the *FRT-neo-FRT* cassette as a result of two homologous recombinations upon transformation with suicide plasmid pJKM12NΔpstK. After verification of the genotype, one randomly selected *pstK* mutant was designated FHM11. (B) Disruption of *pstK* was confirmed by Southern hybridization. Genomic DNA of FHM11 (lane 1) and of FHM1 (lane 2) was digested with HindIII and hybridized with a DIG-labeled probe complementary to a 530 bp fragment overlapping the upstream flanking region and first 320 bp of MMP1490.

**Figure S1**

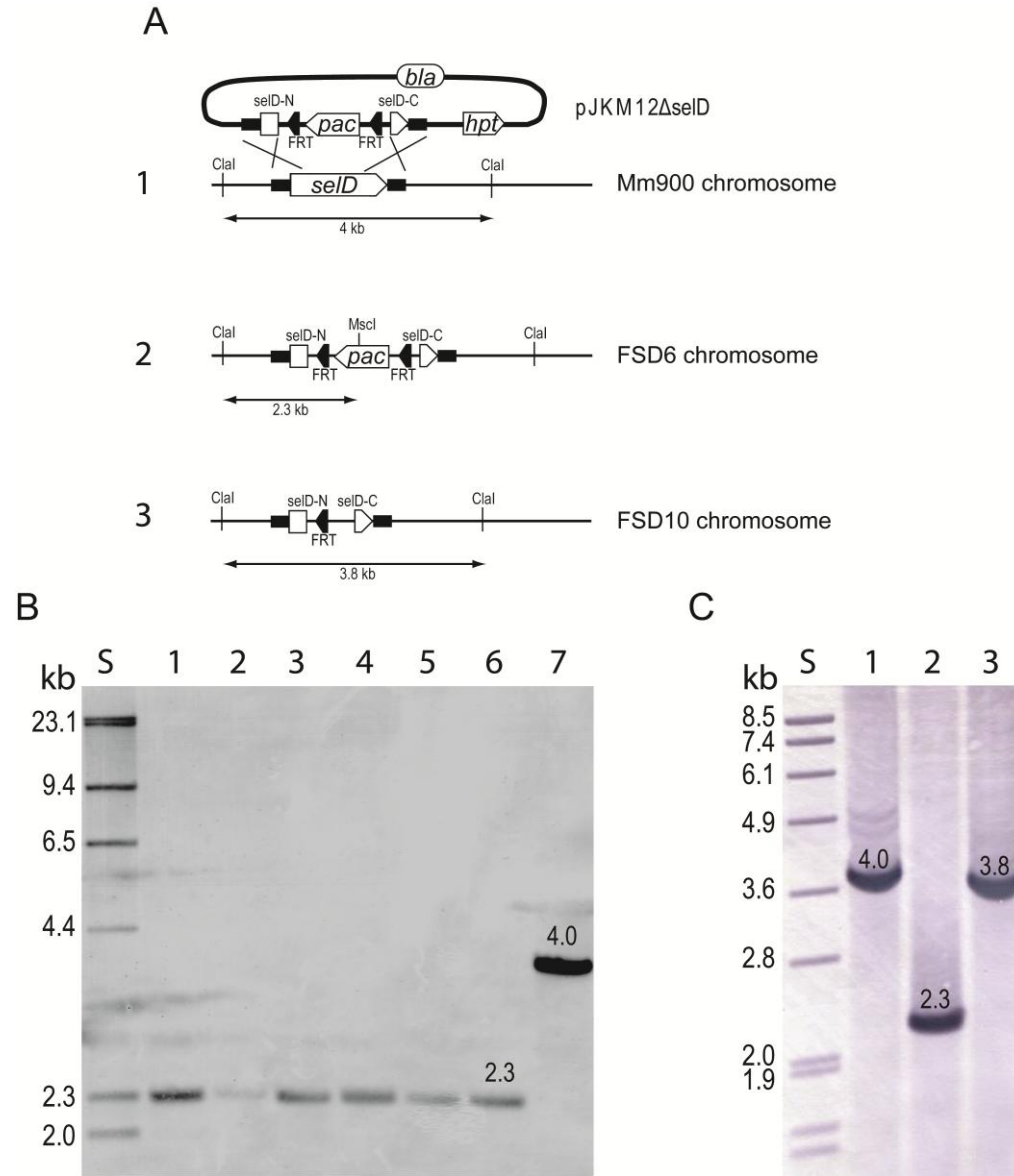

**Figure S2**

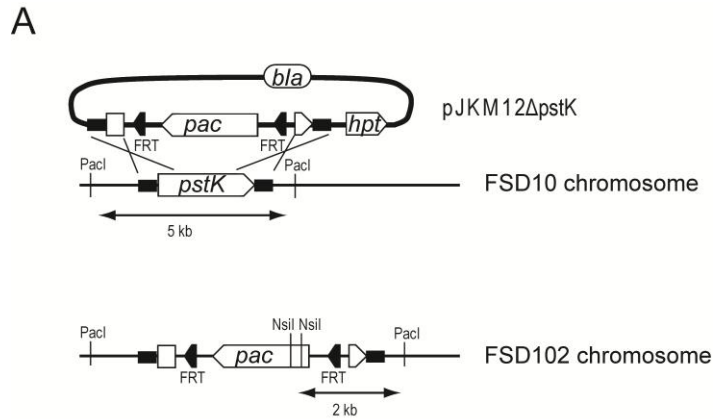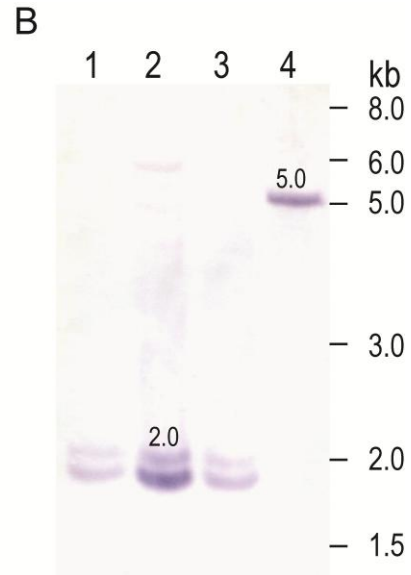

**Figure S3**

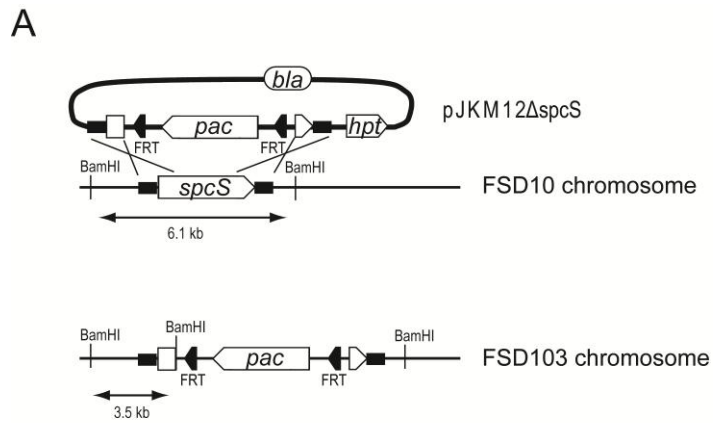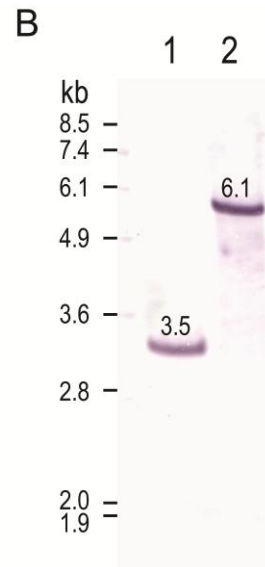

**Figure S4**

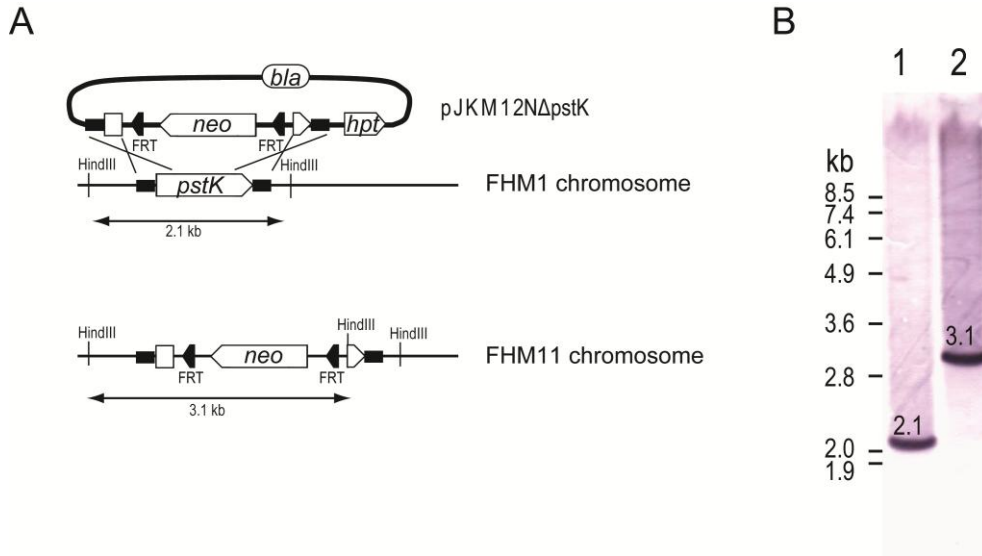

## References

- Lin, W., and Whitman, W.B. (2004) The importance of porE and porF in the anabolic pyruvate oxidoreductase of *Methanococcus maripaludis*. *Archives of Microbiology* **181**: 68-73.
- Moore, B.C., and Leigh, J.A. (2005) Markerless mutagenesis in *Methanococcus maripaludis* demonstrates roles for alanine dehydrogenase, alanine racemase, and alanine permease. *J Bacteriol* **187**: 972-979.
- Stathopoulos, C., Kim, W., Li, T., Anderson, I., Deutsch, B., Palioura, S. et al. (2001) CysteinyI-tRNA synthetase is not essential for viability of the archaeon *Methanococcus maripaludis*. *Proc Natl Acad Sci U S A* **98**: 14292-14297.
- Welander, P.V., and Metcalf, W.W. (2008) Mutagenesis of the C1 oxidation pathway in *Methanosarcina barkeri*: new insights into the Mtr/Mer bypass pathway. *J Bacteriol* **190**: 1928-1936.
- Whitman, W.B., Shieh, J., Sohn, S., Caras, D.S., and Premachandran, U. (1986) Isolation and Characterization of 22 Mesophilic Methanococci. *Systematic and Applied Microbiology* **7**: 235-240.
